# Supplementary material for: Infigratinib (BGJ 398), a Pan-FGFR Inhibitor, Targets P-Glycoprotein and Increases Chemotherapeutic-Induced Mortality of Multidrug-Resistant Tumor Cells
Source: MDPI journal article supplement (doi:10.3390/biomedicines10030601), 2022-03-03
Supplement: s1 [file s1]

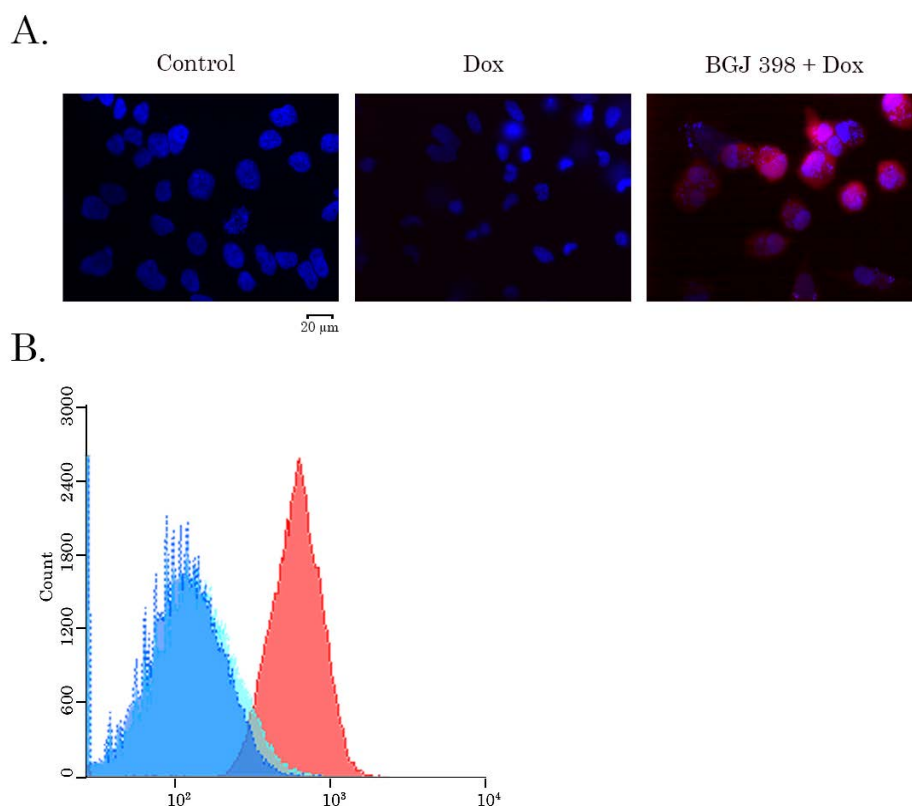

**Supplementary Figure S1.** Fluorescence microscopy **(A)** and FACs **(B)** analysis of the intracellular accumulation of doxorubicin (DOX) in Tx-R GIST T-1 cells. The cells were first incubated with BGJ 398 (1  $\mu$ M) (*right*) or DMSO as a control (*middle*) for 1 h and then incubated with 40  $\mu$ M DOX for an additional 1.5 h. After the wash-out with a pre-warmed culture medium, the BGJ 398-treated cells were additionally incubated with BGJ 398 for 1 h and analyzed by FACs or fluorescence microscopy. For FACs analysis **(B)** histogram illustrating DMSO-treated cells is shown in blue color, cells treated with Dox (40  $\mu$ M) alone (*deep blue*) or in combination with BGJ 398 (1  $\mu$ M) (*red*).

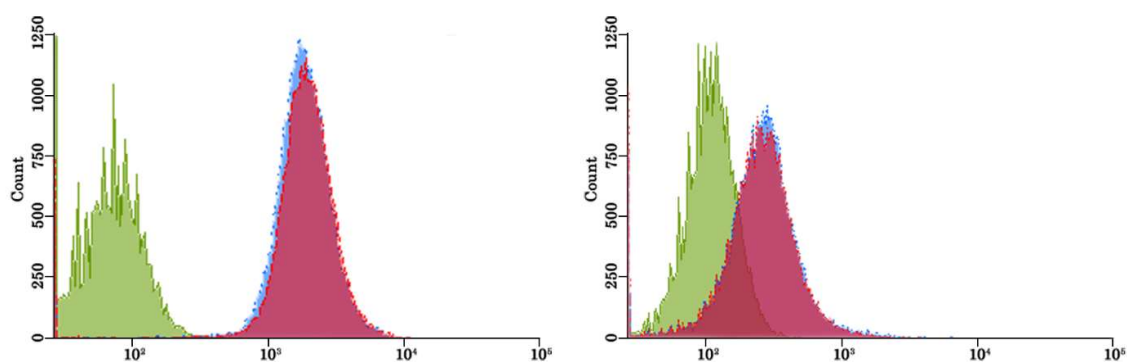

**Supplementary Figure S2.** The intracellular accumulation of Dox in drug-sensitive parental HCC 1806 cells (*left panel*) and Tx-R HCC 1806 cells (*right panel*). The cells were treated with DMSO (*green*), Dox (45  $\mu$ M) alone (*blue*) or in combination with PD 173074 (100  $\mu$ M) (*brown*). The fluorescence intensity was analyzed by FACs. Representative histograms of at least three independent experiments are shown.

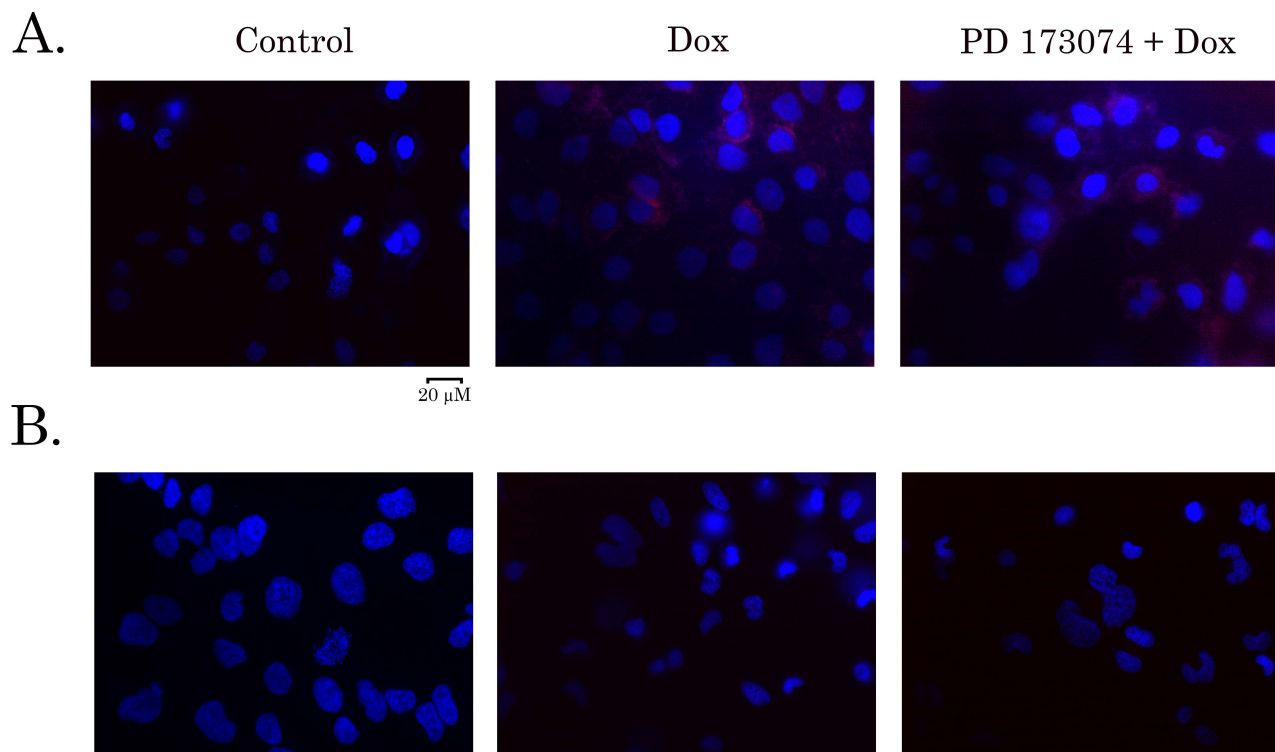

**Supplementary Figure S3.** Fluorescence microscopy analysis of the intracellular accumulation of doxorubicin (DOX) in Tx-R HCC 1806 breast cancer **(A)** GIST T-1 **(B)** cells. The cells were first incubated with PD 173074 (100  $\mu$ M) (*right*) or DMSO as a control (*middle*) for 1 h and then incubated with 40  $\mu$ M DOX for an additional 1.5 h. After the wash-out with a pre-warmed culture medium, the PD 173074-treated cells were additionally incubated with FGFR inhibitor for 1 h. The non-fixed slides were counterstained with Hoechst 33342 for 1 min to outline the nuclei and processed for fluorescence microscopy to obtain the merged images.

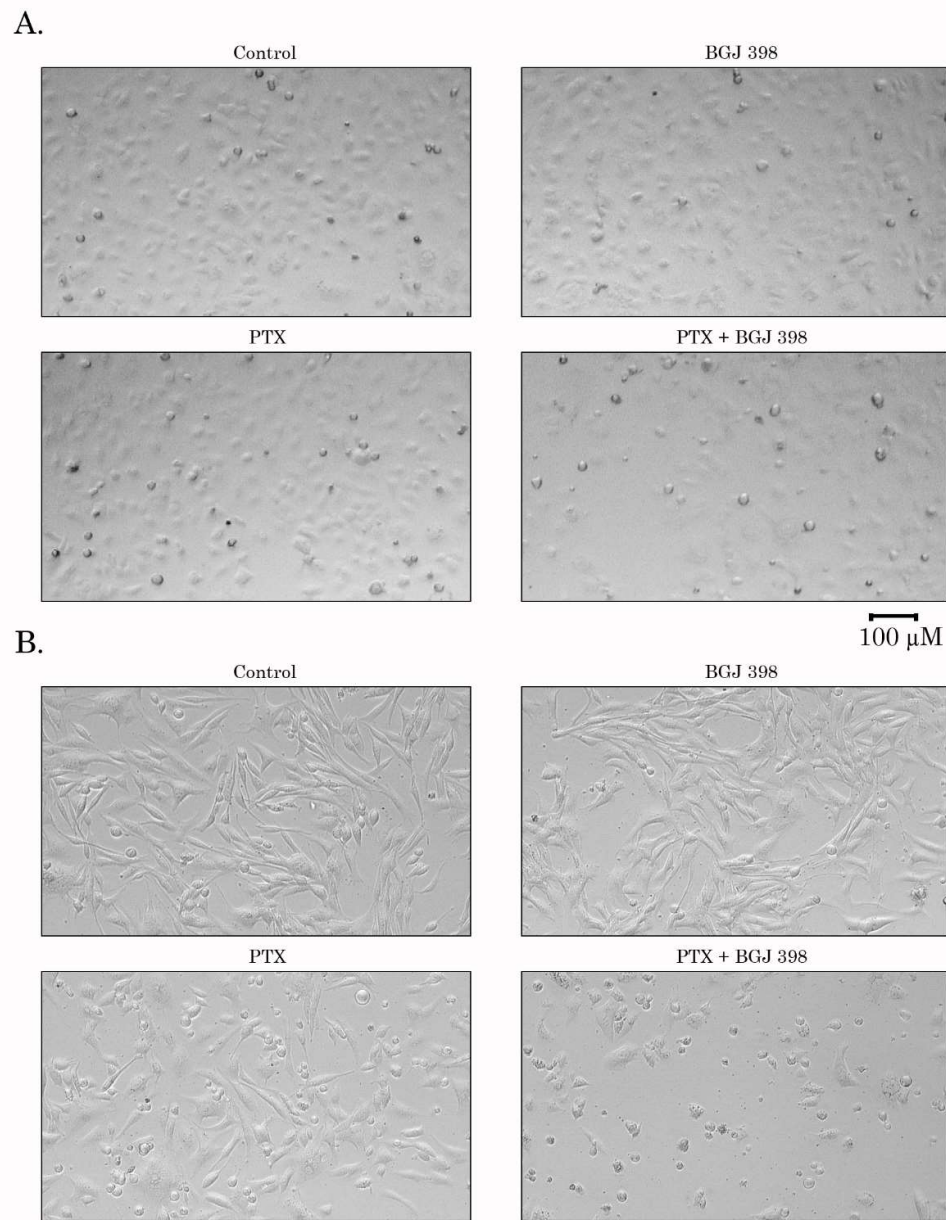

**Supplementary Figure S4.** Morphological changes in Tx-R HCC 1806 breast cancer cells **(A)** and GIST T-1 cells **(B)** after treatment with DMSO (negative control), PTX, BGJ 398 alone or with combination of PTX and BGJ 398 for 48 h. Cells were subjected to light microscopy (Leica). Magnification 10 $\times$ , scale bars 100  $\mu$ M.

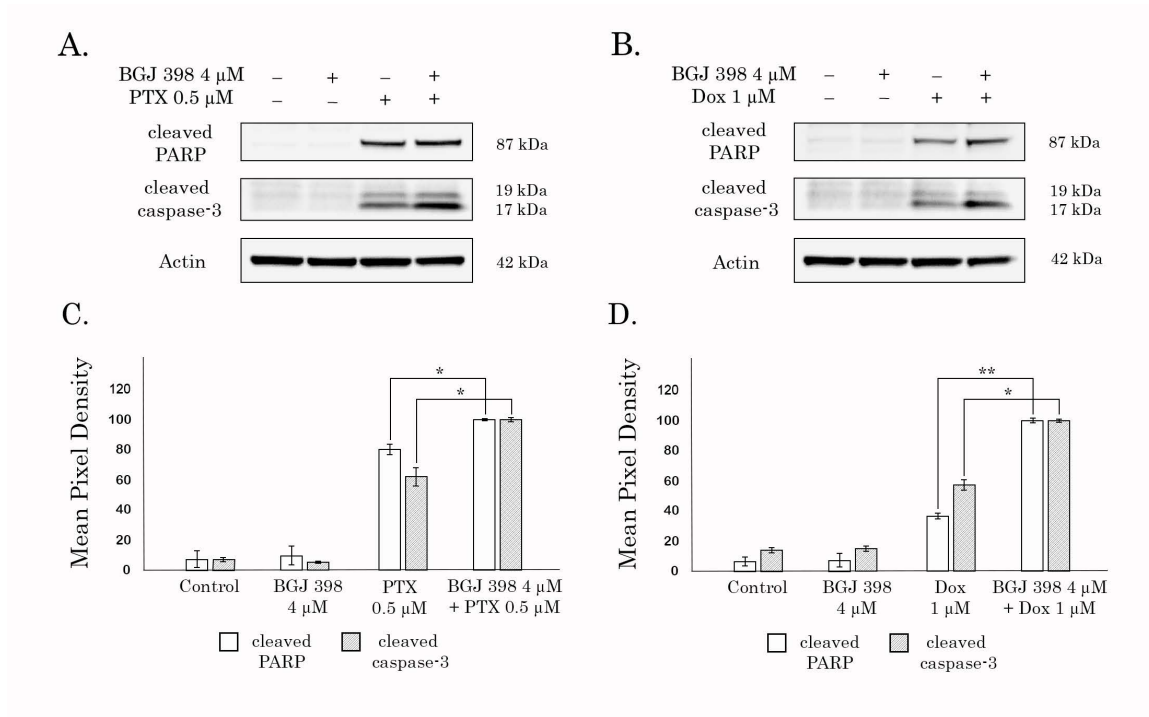

**Supplementary Figure S5.** BGJ 398 potentiates apoptosis of Tx-R GIST T-1 cells treated with combination of PTX (or Dox). Immunoblot analysis for apoptosis markers (cleaved forms of PARP and caspase-3) in Tx-R GIST T-1 cancer cells after treatment with DMSO (negative control), PTX, BGJ 398 alone or in combination (**A**) and DMSO (negative control), Dox, BGJ 398 alone or in combination (**B**) for 48 h. Actin stain is used as a loading control. (**C-D**) Quantification by mean pixel density in the cleaved forms of PARP and caspase-3 in Tx-R GIST T-1 cells treated with DMSO (negative control), PTX, BGJ 398 alone or in combination (**C**) and DMSO (negative control), Dox, BGJ 398 alone or in combination (**D**). Values are means  $\pm$  SD, N = 3. \*  $p < 0.05$ , \*\*  $p < 0.01$  versus untreated cells.

A.

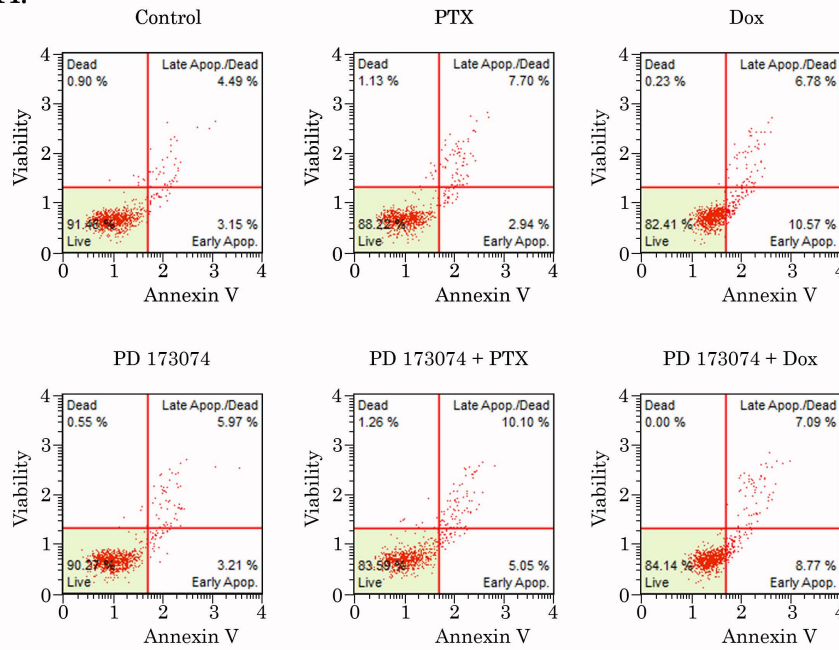

B.

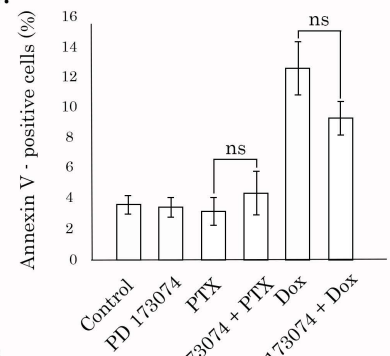

C.

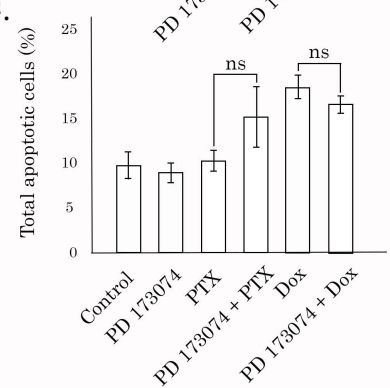

**Supplementary Figure S6.** FACs analysis for apoptotic markers in Tx-R HCC 1806 breast cancer cells treated with PD 173074 and PTX (or Dox) alone or in combination. **(A)** Representative histograms illustrating an increase of early (Annexin V-positive/propidium iodide (PI)-negative) and late (double-positive) apoptotic cells in the HCC1806 Tx-R TNBC cancer cell line treated with DMSO (negative control), PTX (1 $\mu$ M), Dox (0.5  $\mu$ M), PD 173074 (100  $\mu$ M) alone or in combination for 48 h. **(B)** Quantitative analysis of the early apoptotic cells after the treatment as indicated above. **(C)** Quantitative analysis of the total apoptotic cells after the treatment as indicated above. ns - no statistically significant difference.

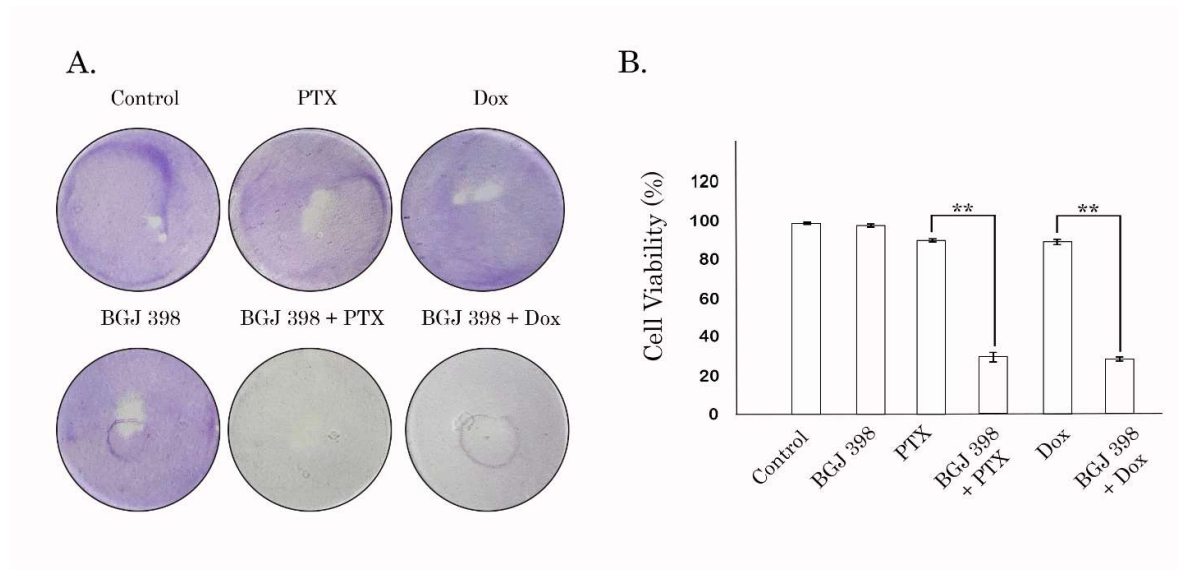

**Supplementary Figure S7.** The impact of BGJ 398 used in combination with PTX or Dox on proliferation and survival of Tx-R GIST T-1 cells. **(A)** Crystal violet staining of Tx-R GIST T-1 cells that were treated with BGJ 398 alone or in combination with PTX (or Dox) for 96 h. The cells treated with DMSO were used as a control. The cells treated with PTX or Dox alone illustrated chemoresistance of Tx-R GIST T-1 cells. The culture dishes were fixed with ice-cold 100% methanol, stained with crystal violet, and photographed; **(B)** Quantification of crystal violet staining of Tx-R GIST T-1 cells treated with PTX and Dox alone or in combination with BGJ 398. The plates were dried, crystal violet was dissolved using 0.1% SDS solution, and absorbance was measured at 590 nm. The graphs represent the mean  $\pm$  SD, N=4. \*\*  $p < 0.01$ .



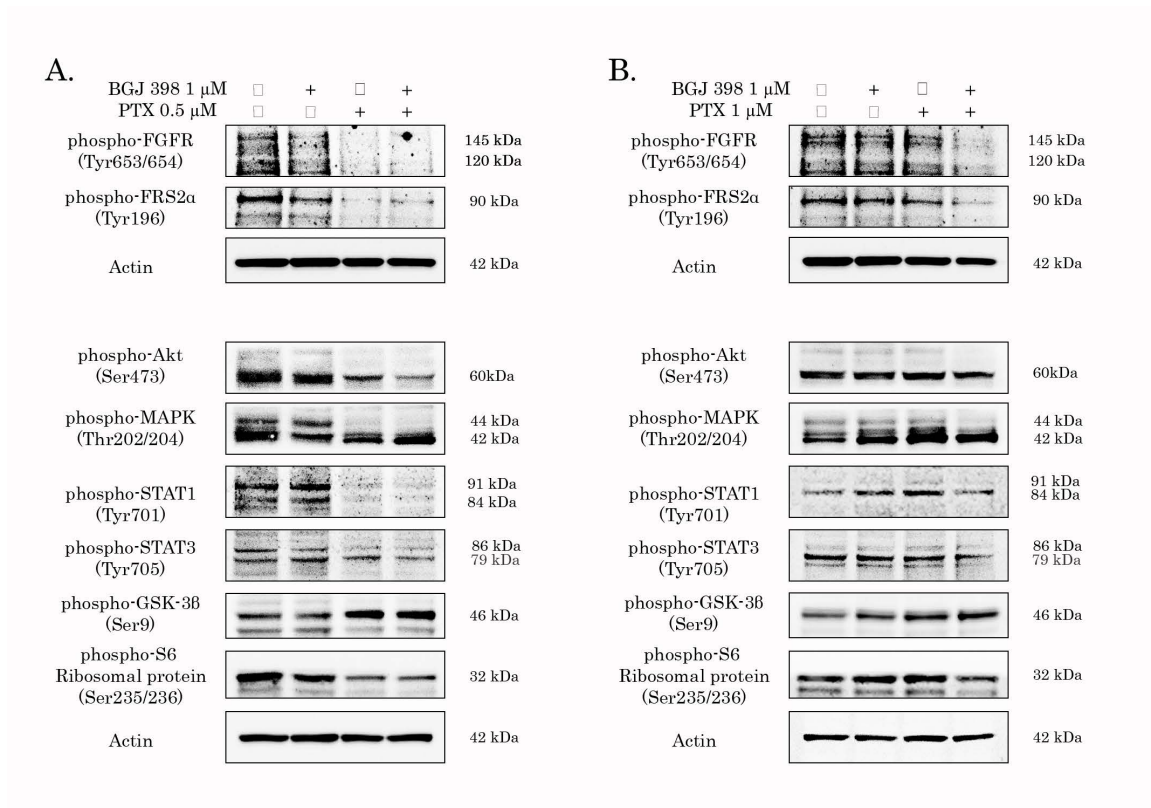

**Supplementary Figure S8.** Expression of the markers of FGFR-signaling in naive **(A)** and Tx-R **(B)** HCC 1806 cells treated with DMSO (control), BGJ 398 and PTX alone or in combination for 72h.



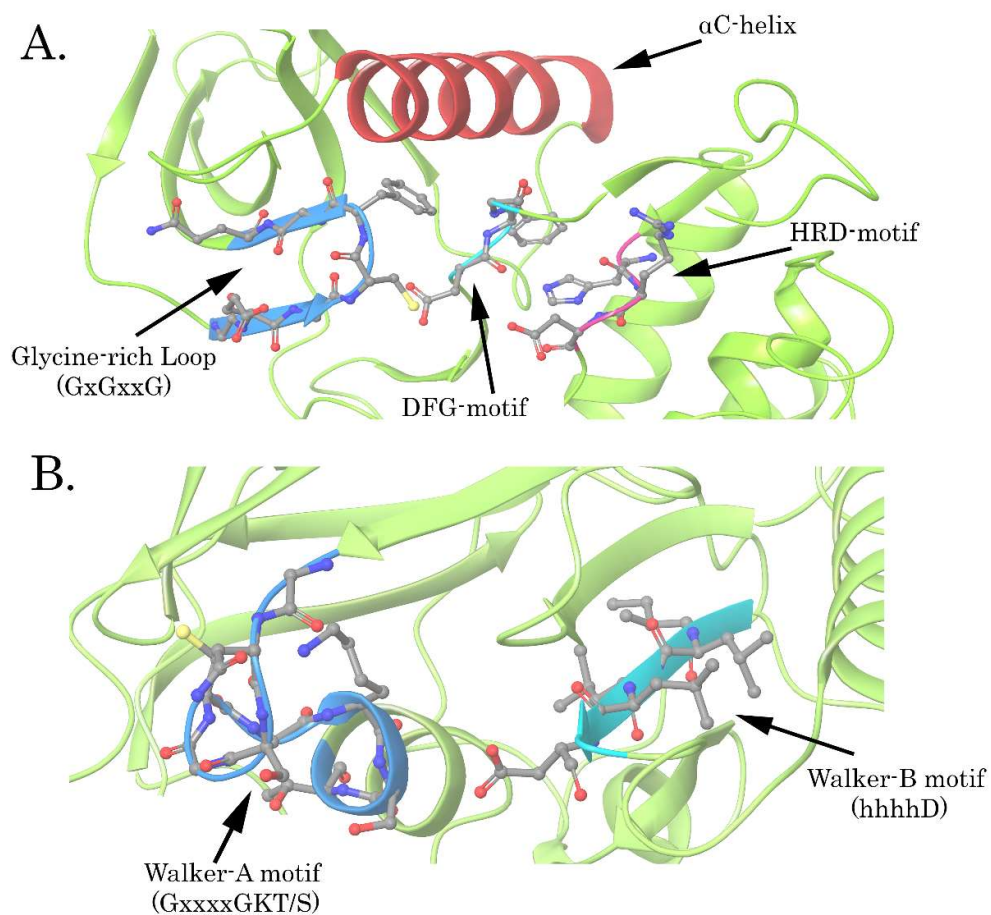

**Supplementary Figure S9.** 3D structure comparison of ATP-binding sites of FGFR2 (**A**) and ABCB1 (**B**). Arrows indicate the most important amino acid motifs of the two domains. The amino acid sequence of motifs is written as a IUPAC one-letter code. x means any amino acid, h means any hydrophobic amino acid.

**Supplementary Table S1.** Fold-increase of ABC-transporters mRNA levels in Tx-R cancer cells compared with the parental cells (determined by RT-qPCR). Values are averages of 3 experiments.

|                  | Genes          | <i>MDR1</i> | <i>MRP1</i> | <i>MRP2</i> | <i>MRP3</i> | <i>MRP4</i> | <i>MRP5</i> | <i>MRP7</i> |
|------------------|----------------|-------------|-------------|-------------|-------------|-------------|-------------|-------------|
| HCC 1806<br>Tx-R | Fold<br>change | 10,56       | 12,95       | 8,17        | 2,81        | 2,21        | 33,82       | 3,81        |
| GIST T-1<br>Tx-R |                | 1,71        | 0,72        | -           | 1,06        | 0,10        | 1,89        | 1,89        |

**Supplementary Table S2.** Fold-decrease of ABC-transporters mRNA levels in BGJ 398-treated Tx-R cancer cells compared with non-treated Tx-R cells (determined by RT-qPCR). Values are averages of 3 experiments.

|                  | Genes          | <i>MDR1</i> | <i>MRP1</i> | <i>MRP2</i> | <i>MRP3</i> | <i>MRP4</i> | <i>MRP5</i> | <i>MRP7</i> |
|------------------|----------------|-------------|-------------|-------------|-------------|-------------|-------------|-------------|
| HCC 1806<br>Tx-R | Fold<br>change | 0,29        | 0,96        | 0,36        | 0,01        | 0,41        | 0,07        | 0,22        |
| GIST T-1<br>Tx-R |                | 0,49        | 0,24        | -           | 0,40        | 12,82       | 0,70        | 0,69        |
